# Supplementary material
Source: publisher site journal article supplement (https://www.dovepress.com/article/121323)
Supplement: Supplementary file 1 [file get_supplementary_file.php]

## Supplementary material

| Agent                   | Reference                           | Study Design                                          | Treatment Arm(s)                                                                                                                                                                             | Reduction in Mean or Median Lesion Count | Adverse Events                                             | Patient satisfaction                                                                                                                                                                                                                                                                                                                                                                                                                                                        |
|-------------------------|-------------------------------------|-------------------------------------------------------|----------------------------------------------------------------------------------------------------------------------------------------------------------------------------------------------|------------------------------------------|------------------------------------------------------------|-----------------------------------------------------------------------------------------------------------------------------------------------------------------------------------------------------------------------------------------------------------------------------------------------------------------------------------------------------------------------------------------------------------------------------------------------------------------------------|
| <b>Ingenol Mebutate</b> | Emilio et al. <sup>9</sup>          | Prospective pilot study                               | A) Applied 1X daily for 3days (n=28)                                                                                                                                                         | 80% reduction in AK lesion number        | 75% of patients had a mild to moderate local skin reaction | Overall scores improved from 24.5% at baseline to 15.5% at day 60 (p=0.031) using the Skindex-16 survey                                                                                                                                                                                                                                                                                                                                                                     |
|                         | Augustin et al. <sup>10</sup>       | Post-hoc analyses for four, phase III clinical trials | A) Ingenol mebutate (n=277) B) Vehicle (n=270) applied 1X for 3 days to face and scalp C) Ingenol mebutate n=226) and vehicle (n=232) applied once daily for 2 days to trunk and extremities | NA                                       | NA                                                         | Positive associations between Treatment Satisfaction Questionnaire for Medication score and degree of clearance for the face/scalp (P < .0001 and global satisfaction P = .0002) and trunk/extremities (P < .0001 and P = .0014, respectively) groups -significant association between Skindex-16 score and clearance for patients in the face/scalp group for change in symptoms (P = .0218), emotions (P = .0002), and overall Skindex-16 score (P = .0006) from baseline |
| <b>Imiquimod</b>        | Waalboer-Spuij et al. <sup>19</sup> | Open-label multicenter study                          | A)Imiquimod applied 1X daily, 3X per week for 4                                                                                                                                              | NA                                       | Itching, redness and pain/burning.6-7%                     | No clinically relevant HRQoL impact according to                                                                                                                                                                                                                                                                                                                                                                                                                            |

|                                   |                              |                               |                                                                                                             |                                                                                                                                                                                                                                                                             |                                                                                                                |                                                                                                                                                                                                                                                                                                     |
|-----------------------------------|------------------------------|-------------------------------|-------------------------------------------------------------------------------------------------------------|-----------------------------------------------------------------------------------------------------------------------------------------------------------------------------------------------------------------------------------------------------------------------------|----------------------------------------------------------------------------------------------------------------|-----------------------------------------------------------------------------------------------------------------------------------------------------------------------------------------------------------------------------------------------------------------------------------------------------|
|                                   |                              |                               | weeks in AK patients (n=118)<br>B) Imiquimod applied 1Xdaily, for 5 days per week for 6 weeks               |                                                                                                                                                                                                                                                                             | discontinued therapy due to adverse events                                                                     | Skindex-17 and SCI; Median TSQM of patients with AKs: complete response: 61, partial response = 54, No response=22                                                                                                                                                                                  |
| <b>Diclofenac Sodium and 5-FU</b> | Segatto et al. <sup>27</sup> | Parallel group clinical trial | A) DES applied 2X daily for 12 weeks (n=15)<br>B) 5-FU cream applied 2Xdaily for 4 weeks (n=13)             | A) DFS group: average number of lesions before treatment was 13.6 and 6.6; p<0.001) after treatment<br>B) 5FU group average number of lesions before treatment was 17.4 and 3.15; p<0.001) after treatment<br>*Significant reduction in 5FU group compared to DFS (p<0.001) | Higher satisfaction regarding adverse events reported in Patients treated with DFS (93.3% vs. 38.4%, p =0.008) | 54% of patients treated with 5-FU reported all lesions to be healed in comparison with 20% of patients treated with DFS according to Patient Global Improvement Score; High degree of satisfaction in both groups (73% in the diclofenac sodium group and 77% in the 5-Fluorouracil group; p=0.827) |
| <b>PDT</b>                        | Tran et al. <sup>32</sup>    | Retrospective Study           | Patients had PDT field therapy using either 160mg/g MAL cream or generic compound 20% 5-ALA solution (n=35) | NA                                                                                                                                                                                                                                                                          | 58% of patients reported severe pain                                                                           | 50% of respondents reported high efficacy; 70% found PDT to be barely affordable; 66% of respondents said they would recommend PDT to others                                                                                                                                                        |
|                                   | Lacour et al. <sup>33</sup>  | Phase III trial               | Patients treated with (MAL) DL-PDT on one side of the                                                       | Total lesion complete response rate of DL-PDT was                                                                                                                                                                                                                           | Mean pain score of DL-PDT 0.7 versus 4.4, for c-PDT on a 0 to 10                                               | 64.8% of subjects were very satisfied with DL-PDT compared to                                                                                                                                                                                                                                       |

|                                 |                                           |                                   |                                                                                                                                      |                                                                                          |                                                                                                                                                                                   |                                                                                                                                             |
|---------------------------------|-------------------------------------------|-----------------------------------|--------------------------------------------------------------------------------------------------------------------------------------|------------------------------------------------------------------------------------------|-----------------------------------------------------------------------------------------------------------------------------------------------------------------------------------|---------------------------------------------------------------------------------------------------------------------------------------------|
|                                 |                                           |                                   | face and (MAL) c-PDT contralaterally (n=96)                                                                                          | similar to that of c-PDT (70% vs 74% respectively)                                       | scale; $p < 0.001$ )                                                                                                                                                              | 18.9% with c-PDT; More patients found DL-PDT to be convenient when compared to those treated with c-PDT (53.8% versus 10.5%, respectively). |
| <b>Imiquimod and PDT</b>        | Serra-Guillen et al. <sup>22</sup> [2][2] | Prospective comparative study     | A) PDT administered with MAL cream in a single session (n=29)<br>B) Imiquimod applied 3X per week every other day for 4 weeks (n=29) | N/A                                                                                      | 34% poor tolerance for PDT and 28% of Imiquimod                                                                                                                                   | 93% of patients treated with PDT were very satisfied compared to 63% treated with imiquimod ( $p = 0.004$ )                                 |
| <b>Diclofenac and PDT</b>       | Zane et al. <sup>1</sup>                  | Prospective study                 | A) Self applied diclofenac twice daily for 90 days (n=100)<br>B) 2 treatments of PDT given (n=100)                                   | Remission rates were 85.9% with MAL-PDT and 51.8% with diclofenac ( $p < 0.0001$ )       | All patients treated with PDT reported mild-to moderate pain; Mild to moderate erythema was reported with itching and burning reported in 84/100 patients treated with diclofenac | Patients treated with MAL-PDT noted being very satisfied than those treated with DHA (59% versus 6%, $P < 0.0001$ )                         |
| <b>PDT, Imiquimod, and 5-FU</b> | Tierney et al. <sup>36</sup>              | Self-Administered survey          | Patients who had received PDT for AKs (n=45)                                                                                         | N/A                                                                                      | N/A                                                                                                                                                                               | Patients significantly preferred PDT to 5-FU ( $p < 0.001$ ) and imiquimod ( $p = 0.031$ ), excision ( $p = 0.02$ ).                        |
| <b>PDT and Cryotherapy</b>      | Morton et al. <sup>39</sup>               | Intraindividual comparative study | Subjects received treatment with PDT and cryotherapy randomly allocated to alternate sides of the                                    | 86.9% lesion reduction at week 12 for PDT and 76.2% for cryotherapy compared to baseline | N/A                                                                                                                                                                               | Patients preferred MAL-PDT to cryotherapy (49.2% vs. 20.6%, $p < 0.001$ ),                                                                  |

|                                |                                  |                                         |                                                                                                                                                    |                                                                                                                                            |                                                                                                                |                                                                                                                                                                                                              |
|--------------------------------|----------------------------------|-----------------------------------------|----------------------------------------------------------------------------------------------------------------------------------------------------|--------------------------------------------------------------------------------------------------------------------------------------------|----------------------------------------------------------------------------------------------------------------|--------------------------------------------------------------------------------------------------------------------------------------------------------------------------------------------------------------|
|                                |                                  |                                         | face/scalp<br>(n=119)                                                                                                                              | (p<0.001);<br>89.1%<br>lesion<br>reduction at<br>week 24 for<br>PDT and<br>86.1% for<br>cryotherapy<br>compared to<br>baseline<br>(p=0.20) |                                                                                                                |                                                                                                                                                                                                              |
| <b>PDT and<br/>Cryotherapy</b> | Kaufmann<br>et al. <sup>40</sup> | Intraindividual<br>comparative<br>study | Subjects<br>received<br>treatment<br>with PDT and<br>cryotherapy<br>randomly<br>allocated to<br>alternate sides<br>of the<br>face/scalp<br>(n=121) | 78.0 %<br>lesion<br>reduction at<br>week 24 for<br>PDT and<br>88.0% for<br>cryotherapy<br>compared to<br>baseline<br>(p=0.02)              | 63% and 45%<br>of patients<br>experienced<br>adverse events<br>with<br>cryotherapy<br>and PDT,<br>respectively | MAL-PDT<br>preferred to<br>cryotherapy for<br>comfort (60%<br>vs. 10%, p<br><0.001), healing<br>outcome (64%<br>vs. 6%, p<br><0.001), and<br>overall patient<br>satisfaction<br>(49% vs. 20%,<br>p < 0.001). |
